# Supplementary material for: RNA Sequencing of Medusavirus Suggests Remodeling of the Host Nuclear Environment at an Early Infection Stage
Source: PubMed Central journal article supplement (PMC8557863; doi:10.1128/spectrum.00064-21), 2021-09-29
Supplement: spectrum00064-21_supp_3_seq15.pdf [file spectrum00064-21_supp_3_seq15.pdf]

Table. S1 Motifs found under width parameter: 8-10 nucleotides

| Consensus sequence | width | sites | e-value  |
|--------------------|-------|-------|----------|
| AMAAAAVRR          | 10    | 282   | 1.6e-120 |
| GSCRTCGCCG         | 10    | 134   | 3.0e-033 |
| RTGAMTTCAT         | 10    | 44    | 2.9e-027 |
| SVCATAAWA          | 10    | 93    | 9.6e-007 |
| ACACCACAM          | 10    | 54    | 3.0e-009 |
| DYGCGATG           | 8     | 97    | 1.2e-003 |

Table. S2 Motifs found under width parameter: 6-15 nucleotides

| Consensus sequence | width | sites | e-value  |
|--------------------|-------|-------|----------|
| VMAAMAAMAVMAAMA    | 15    | 306   | 5.5e-143 |
| CCAYATGAMBTCAYA    | 15    | 56    | 2.1e-117 |
| GCCRYCGCCGH        | 11    | 150   | 2.3e-029 |
| DRAAWAAA           | 8     | 111   | 1.2e-016 |
| GYGTTKGTGGTGGTG    | 15    | 23    | 1.3e-013 |
| CCCCTTTTWDHGYCG    | 15    | 35    | 2.4e-012 |
| CAYCRYTTYTCDDTT    | 15    | 23    | 5.8e-004 |

Table. S3 Motifs found under width parameter: 8-25 nucleotides

| Consensus sequence       | width | sites | e-value  |
|--------------------------|-------|-------|----------|
| GCCATRTGAVKTCATRTGGYSRSG | 24    | 53    | 8.4e-183 |
| VMAAMAAMARMAAMA          | 15    | 251   | 3.1e-146 |
| GCCRYCGYCGH              | 11    | 134   | 7.7e-029 |

|                       |    |     |          |
|-----------------------|----|-----|----------|
| NRAAWAAA              | 8  | 123 | 2.0e-026 |
| GTGTTKGTGGTGGTG       | 15 | 37  | 1.3e-015 |
| BBDCGRCRYWAAAAGGGGNSG | 21 | 29  | 1.2e-013 |
| YKCCRWKMAAWATGTCGACAC | 21 | 19  | 3.2e-011 |
